# Supplementary material
Source: ML conference proceedings conference paper supplement (https://openreview.net/forum?id=eQeYyup1tm)
Supplement: supplementary_material [file attachment]

■ Observation (sec 3): Lottery ticket significantly reduces delayed generalization

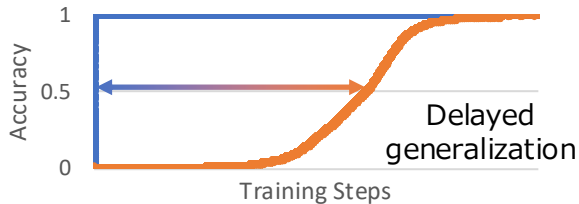

(a) Dense network

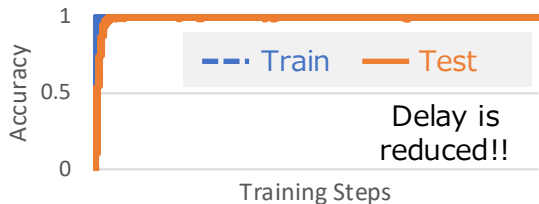

(b) Lottery Ticket (Good Subnetworks)

■ What happen during delayed generalization?  
Why LT reduce delayed generalization?

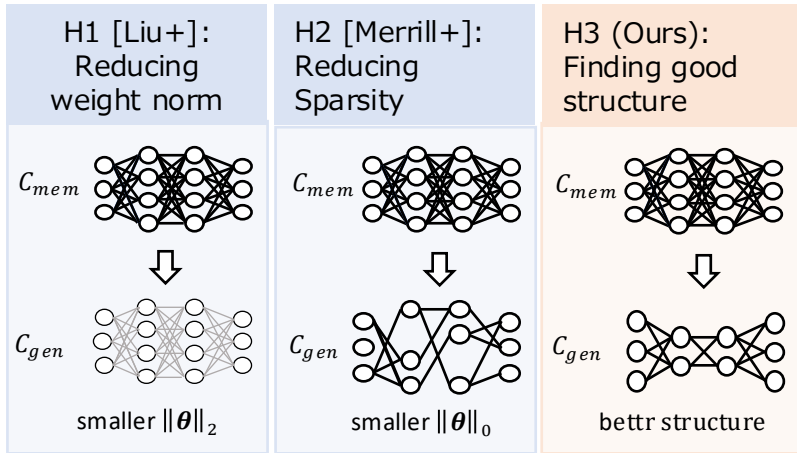

Experiments: sec 4: controlled experiments, sec 5.1 Progress measure using H3, sec 5.2 pruning as force to grokking, and sec 5.3 link to good representation
